# Supplementary material for: Keu Contamination in Tuscany: The Life Cycle Assessment of Remediation Project as a Decision Support Tool for Local Administration
Source: MDPI journal article supplement (doi:10.3390/su142214828), 2022-11-10
Supplement: s1 [file s1]

**Table S1.** Complete characterization of backfilling materials (C1-C7), contaminated deep soil sample (R1), natural soil samples (T1-T7) and white sample (B).

| Sample | UoM   | C1    | C2    | C3    | C4    | C5    | C6    | C7    | R1    | T1    | T2    | T3    | T4    | T5    | T6    | T7    | B     |
|--------|-------|-------|-------|-------|-------|-------|-------|-------|-------|-------|-------|-------|-------|-------|-------|-------|-------|
| s      |       |       |       |       |       |       |       |       |       |       |       |       |       |       |       |       |       |
| Cd     | mg/Kg | 0.5   | 1.1   | 0.6   | <0.2  | 0.6   | 0.9   | 0.5   | <0.8  | <0.2  | <0.2  | <0.2  | <0.2  | <0.2  | 0.2   | <0.2  | 0.2   |
| Cr     | mg/Kg | 1,232 | 2,371 | 1,853 | 38    | 3,309 | 2,775 | 1,812 | 3,280 | 63    | 80    | 74    | 76    | 65    | 103   | 90    | 107   |
| Cr(VI) | mg/Kg | 9.0   | 15.0  | 9.4   | 0.6   | 8.9   | 5.0   | 6.0   | 25.0  | 1.2   | 3.2   | 1.2   | 1.4   | 1.4   | 1.6   | 2.6   | 2.0   |
| Ni     | mg/Kg | 55    | 53    | 58    | 22    | 48    | 66    | 34    | 44    | 43    | 35    | 45    | 53    | 48    | 69    | 42    | 102   |
| Pb     | mg/Kg | 26    | 63    | 26    | 17    | 30    | 31    | 24    | 48    | 13    | <10   | 10    | 11    | 15    | 16    | 13    | 15    |
| Cu     | mg/Kg | 53    | 124   | 135   | 29    | 101   | 192   | 107   | 99    | 21    | 16    | 16    | 22    | 23    | 40    | 22    | 41    |
| Zn     | mg/Kg | 135   | 285   | 135   | 36    | 234   | 214   | 167   | 279   | 53    | 47    | 62    | 71    | 59    | 87    | 54    | 90    |
| As     | mg/Kg | 5.8   | 7.8   | 7.6   | 3.1   | 6.5   | 6.9   | 6.6   | 4.3   | 6.6   | 6.0   | 7.2   | 7.5   | 7.4   | 9.4   | 0.3   | 8.7   |
| Sb     | mg/Kg | 7.3   | 18.0  | 9.0   | <1    | 13.0  | 15.0  | 12.0  | 18.0  | <1    | <1    | <1    | <1    | <1    | <1    | <1    | <1    |
| Be     | mg/Kg | 0.5   | 0.6   | 0.6   | 0.5   | 0.5   | 0.5   | 0.4   | 0.3   | 1.1   | 0.9   | 1.2   | 1.3   | 1.1   | 1.7   | 0.9   | 1.5   |
| Co     | mg/Kg | 8.4   | 9.3   | 9.0   | 5.0   | 9.3   | 13.0  | 6.7   | 8.5   | 11.0  | 8.7   | 9.8   | 11.0  | 12.0  | 15.0  | 9.7   | 13.0  |
| Fe     | mg/Kg | 25,48 | 25,92 | 20,90 | 10,05 | 32.56 | 36.18 | 22.20 | 24,98 | 20,58 | 18,27 | 22,53 | 34,09 | 21,66 | 38,61 | 19,45 | 31,77 |
| Mn     | mg/Kg | 8     | 8     | 5     | 2     | 7     | 4     | 4     | 0     | 9     | 4     | 1     | 4     | 1     | 2     | 1     | 5     |
| Mo     | mg/Kg | -     | 3.1   | 1.9   | 0.3   | 3.6   | 1.9   | 2.7   | 3.9   | 0.4   | 0.4   | 0.4   | 0.4   | 0.1   | 0.4   | 0.4   | 6.5   |
| Hg     | mg/Kg | 0.6   | 0.7   | 0.1   | <0.1  | 0.2   | 0.3   | 1.5   | 0.2   | <0.1  | 0.1   | <0.1  | 0.1   | <0.1  | <0.1  | 0.3   | <0.1  |
| Se     | mg/Kg | 0.6   | 2.5   | 1.4   | <0.3  | 2.1   | 42.0  | 0.9   | 1.8   | 0.4   | <0.3  | 0.5   | 0.4   | <0.3  | 0.8   | <0.3  | 0.8   |
| Sn     | mg/Kg | -     | 22.0  | 9.5   | 1.3   | 10.0  | 21.0  | 12.0  | 14.0  | 1.6   | 1.6   | 2.1   | 1.8   | 1.7   | 2.5   | 1.7   | 3.1   |
| Tl     | mg/Kg | 0.1   | 0.1   | 0.1   | 0.1   | 0.1   | 0.1   | 0.1   | 0.1   | 0.2   | 0.2   | 0.3   | 0.3   | 0.2   | 0.4   | 0.2   | 0.3   |
| V      | mg/Kg | 25    | 22    | 29    | 23    | 25    | 23    | 18    | 24    | 43    | 35    | 50    | 55    | 42    | 70    | 35    | 78    |

**Table S2.** Leaching test results of backfill material samples (C1-C7) and contaminated deep soil sample (R1).

| <b>Samples</b> | <b>UoM</b> | <b>C1</b> | <b>C2</b> | <b>C3</b> | <b>C4</b> | <b>C5</b> | <b>C6</b> | <b>C7</b> | <b>R1</b> |
|----------------|------------|-----------|-----------|-----------|-----------|-----------|-----------|-----------|-----------|
| Sulfates       | mg/l       | 432       | 921       | 233       | 61.2      | 1007      | 1008      | 333       | 1425      |
| Chlorides      | mg/l       | 16.6      | 8.1       | 2.5       | 3.8       | 34.6      | 31.8      | 22.1      | 26        |
| Fluorides      | mg/l       | 0.54      | 0.25      | 0.5       | 0.65      | 0.52      | < 0.05    | 0.39      | < 0.25    |
| Barium         | µg/l       | 36        | 36        | 32        | 25        | 31        | 35        | 36        | 34        |
| Copper         | µg/l       | 1.9       | 1.2       | 1.3       | 53        | 2.6       | < 1       | 2.5       | < 1       |
| Zinc           | µg/l       | < 1       | 2.1       | < 1       | < 1       | < 1       | < 1       | < 1       | 1.7       |
| Nickel         | µg/l       | < 1       | 1.1       | < 1       | < 1       | < 1       | ND        | ND        | 1.2       |
| Arsenic        | µg/l       | 1.9       | 1.3       | 3         | 2.9       | 1.3       | 1.5       | 1.6       | 1.6       |
| Cadmium        | µg/l       | < 0.05    | < 0.05    | < 0.05    | < 0.05    | < 0.05    | < 0.05    | < 0.05    | < 0.05    |
| Total chromium | µg/l       | 756       | 2068      | 824       | 21        | 780       | 486       | 1160      | 2800      |
| Lead           | µg/l       | < 1       | < 1       | < 1       | < 1       | < 1       | < 1       | < 1       | < 1       |
| Selenium       | µg/l       | 1.4       | 1.7       | 1.9       | 0.8       | 1         | 1.9       | 1.9       | 1.8       |
| Mercury        | µg/l       | < 0.1     | < 0.1     | < 0.1     | < 0.1     | < 0.1     | < 0.1     | < 0.1     | < 0.1     |
| Molybdenum     | µg/l       | 17        | 23        | 14        | 6.8       | 38        | 27        | 25        | 33        |
| Antimony       | µg/l       | 7.8       | 17        | 16        | 1.4       | 7,4       | 17        | 13        | 19        |
| Chromium (VI)  | µg/l       | 756       | 2068      | 824       | 21        | 780       | 486       | 1160      | 2800      |

**Table S3.** Environmental data used for the Do-Nothing scenario and LCIA results.

|              |           |          | Abiotic depletion | Abiotic depletion (fuel) | Global warming | Ozone layer depletion | Human toxicity | Fresh water aquatic ecotox. | Marine aquatic ecotoxicity | Terrestrial ecotoxicity | Photochemical oxidation | Acidification | Eutrophication |
|--------------|-----------|----------|-------------------|--------------------------|----------------|-----------------------|----------------|-----------------------------|----------------------------|-------------------------|-------------------------|---------------|----------------|
| Process      | Quantity  | UoM      | kg Sb eq          | MJ                       | kg CO2 eq      | kg CFC-11 eq          | kg 1,4-DB eq   | kg 1,4-DB eq                | kg 1,4-DB eq               | kg 1,4-DB eq            | kg C2H4 eq              | kg SO2 eq     | kg PO4 eq      |
| Cd           | 5.1       | kg       | 0                 | 0                        | 0              | 0                     | 3,4E+02        | 4,0E+03                     | 5,7E+05                    | 8,6E+02                 | 0                       | 0             | 0              |
| Cr           | 15,722.7  | kg       | 0                 | 0                        | 0              | 0                     | 0              | 0                           | 0                          | 0                       | 0                       | 0             | 0              |
| Cr(VI)       | 72.1      | kg       | 0                 | 0                        | 0              | 0                     | 3,6E+04        | 1,5E+03                     | 1,9E+05                    | 4,5E+05                 | 0                       | 0             | 0              |
| Ni           | 434.3     | kg       | 0                 | 0                        | 0              | 0                     | 8,6E+04        | 7,3E+05                     | 5,1E+08                    | 1,0E+05                 | 0                       | 0             | 0              |
| Pb           | 235.6     | kg       | 0                 | 0                        | 0              | 0                     | 6,9E+04        | 1,5E+03                     | 1,8E+05                    | 7,7E+03                 | 0                       | 0             | 0              |
| Cu           | 974.8     | kg       | 0                 | 0                        | 0              | 0                     | 1,2E+03        | 5,8E+05                     | 1,2E+08                    | 1,4E+04                 | 0                       | 0             | 0              |
| Zn           | 1,292.4   | kg       | 0                 | 0                        | 0              | 0                     | 5,5E+02        | 6,2E+04                     | 9,3E+06                    | 3,2E+04                 | 0                       | 0             | 0              |
| As           | 56.0      | kg       | 0                 | 0                        | 0              | 0                     | 5,7E+04        | 7,5E+03                     | 4,3E+06                    | 1,9E+05                 | 0                       | 0             | 0              |
| Sb           | 83.2      | kg       | 0                 | 0                        | 0              | 0                     | 2,2E+05        | 8,3E+02                     | 1,1E+06                    | 1,0E+02                 | 0                       | 0             | 0              |
| Be           | 4.4       | kg       | 0                 | 0                        | 0              | 0                     | 3,1E+04        | 2,0E+05                     | 1,2E+09                    | 1,6E+04                 | 0                       | 0             | 0              |
| Co           | 71.8      | kg       | 0                 | 0                        | 0              | 0                     | 4,2E+03        | 1,2E+05                     | 1,6E+08                    | 1,6E+04                 | 0                       | 0             | 0              |
| Fe           | 188,993.9 | kg       | 0                 | 0                        | 0              | 0                     | 0              | 0                           | 0                          | 0                       | 0                       | 0             | 0              |
| Mn           | 3,397.3   | kg       | 0                 | 0                        | 0              | 0                     | 0              | 0                           | 0                          | 0                       | 0                       | 0             | 0              |
| Mo           | 15.3      | kg       | 0                 | 0                        | 0              | 0                     | 4,7E+04        | 4,0E+03                     | 1,8E+07                    | 5,5E+02                 | 0                       | 0             | 0              |
| Hg           | 2.5       | kg       | 0                 | 0                        | 0              | 0                     | 2,7E+03        | 2,1E+03                     | 4,1E+05                    | 1,4E+05                 | 0                       | 0             | 0              |
| Se           | 40.4      | kg       | 0                 | 0                        | 0              | 0                     | 1,1E+06        | 5,9E+04                     | 5,1E+08                    | 4,4E+03                 | 0                       | 0             | 0              |
| Sn           | 84.2      | kg       | 0                 | 0                        | 0              | 0                     | 4,4E+01        | 5,8E+02                     | 7,0E+04                    | 2,5E+03                 | 0                       | 0             | 0              |
| Tl           | 0.8       | kg       | 0                 | 0                        | 0              | 0                     | 9,2E+04        | 3,2E+03                     | 1,1E+07                    | 5,4E+02                 | 0                       | 0             | 0              |
| V            | 205.2     | kg       | 0                 | 0                        | 0              | 0                     | 3,5E+05        | 9,5E+05                     | 9,1E+08                    | 2,8E+05                 | 0                       | 0             | 0              |
| <b>Total</b> | <b>-</b>  | <b>-</b> | <b>0</b>          | <b>0</b>                 | <b>0</b>       | <b>0</b>              | <b>2,1E+06</b> | <b>2,7E+06</b>              | <b>3,4E+09</b>             | <b>1,3E+06</b>          | <b>0</b>                | <b>0</b>      | <b>0</b>       |

**Table S4.** Environmental data used for the Dig and Dump scenario and LCIA results.

|                              |           |     | Abiotic depletion | Abiotic depletion (fuel) | Global warming | Ozone layer depletion | Human toxicity | Fresh water aquatic ecotox. | Marine aquatic ecotoxicity | Terrestrial ecotoxicity | Photochemical oxidation | Acidification  | Eutrophication |
|------------------------------|-----------|-----|-------------------|--------------------------|----------------|-----------------------|----------------|-----------------------------|----------------------------|-------------------------|-------------------------|----------------|----------------|
| Process                      | Quantity  | UoM | kg Sb eq          | MJ                       | kg CO2 eq      | kg CFC-11 eq          | kg 1,4-DB eq   | kg 1,4-DB eq                | kg 1,4-DB eq               | kg 1,4-DB eq            | kg C2H4 eq              | kg SO2 eq      | kg PO4 eq      |
| Excavator transport          | 58.8      | tkm | 1,1E-05           | 8,1E+01                  | 5,3E+00        | 1,0E-06               | 2,3E+00        | 7,4E-01                     | 1,6E+03                    | 7,1E-03                 | 6,7E-04                 | 1,7E-02        | 3,8E-03        |
| Excavator consumption        | 56,100.0  | kWh | 1,0E-02           | 2,5E+05                  | 1,8E+04        | 3,1E-03               | 2,2E+03        | 1,9E+03                     | 3,2E+06                    | 6,3E+00                 | 3,0E+00                 | 1,4E+02        | 3,2E+01        |
| Backfill material transport  | 534,109.5 | tkm | 1,0E-01           | 7,4E+05                  | 4,8E+04        | 9,2E-03               | 2,1E+04        | 6,7E+03                     | 1,4E+07                    | 6,4E+01                 | 6,1E+00                 | 1,6E+02        | 3,4E+01        |
| Vehicles for EoL transport   | 42.9      | tkm | 8,3E-06           | 5,9E+01                  | 3,9E+00        | 7,4E-07               | 1,7E+00        | 5,4E-01                     | 1,1E+03                    | 5,2E-03                 | 4,9E-04                 | 1,3E-02        | 2,8E-03        |
| Excavator transport          | 58.8      | tkm | 1,1E-05           | 8,1E+01                  | 5,3E+00        | 1,0E-06               | 2,3E+00        | 7,4E-01                     | 1,6E+03                    | 7,1E-03                 | 6,7E-04                 | 1,7E-02        | 3,8E-03        |
| Backfill materials disposal  | 8,976.6   | t   | 5,8E+00           | 7,9E+06                  | 9,9E+06        | 6,1E-02               | 5,9E+05        | 2,0E+06                     | 1,8E+09                    | 6,5E+03                 | 2,2E+03                 | 7,4E+03        | 9,3E+04        |
| Quarry stabilized production | 9,200.0   | t   | 6,5E-01           | 3,5E+05                  | 3,1E+04        | 3,6E-03               | 3,0E+04        | 3,0E+04                     | 4,8E+07                    | 8,8E+01                 | 8,7E+00                 | 2,0E+02        | 5,7E+01        |
| Quarry stabilized transport  | 213,440.0 | tkm | 4,1E-02           | 3,0E+05                  | 1,9E+04        | 3,7E-03               | 8,4E+03        | 2,7E+03                     | 5,7E+06                    | 2,6E+01                 | 2,4E+00                 | 6,3E+01        | 1,4E+01        |
| Bobcat consumption           | 5,440.0   | kWh | 9,7E-04           | 2,4E+04                  | 1,8E+03        | 3,0E-04               | 2,2E+02        | 1,8E+02                     | 3,1E+05                    | 6,1E-01                 | 2,9E-01                 | 1,3E+01        | 3,1E+00        |
| <b>Total</b>                 |           |     | <b>6,6E+00</b>    | <b>9,6E+06</b>           | <b>1,0E+07</b> | <b>8,0E-02</b>        | <b>6,5E+05</b> | <b>2,1E+06</b>              | <b>1,9E+09</b>             | <b>6,7E+03</b>          | <b>2,2E+03</b>          | <b>8,0E+03</b> | <b>9,3E+04</b> |

**Table S5.** Environmental data used for the Soil Capping scenario and LCIA results.

| Process                            | Quantity | UoM | Abiotic depletion<br>kg Sb eq | Abiotic depletion (fuel)<br>MJ | Global warming<br>kg CO <sub>2</sub> eq | Ozone layer depletion<br>kg CFC-11 eq | Human toxicity<br>kg 1,4-DB eq | Fresh water aquatic ecotox.<br>kg 1,4-DB eq | Marine aquatic ecotoxicity<br>kg 1,4-DB eq | Terrestrial ecotoxicity<br>kg 1,4-DB eq | Photochemical oxidation<br>kg C <sub>2</sub> H <sub>4</sub> eq | Acidification<br>kg SO <sub>2</sub> eq | Eutrophication<br>kg PO <sub>4</sub> eq |
|------------------------------------|----------|-----|-------------------------------|--------------------------------|-----------------------------------------|---------------------------------------|--------------------------------|---------------------------------------------|--------------------------------------------|-----------------------------------------|----------------------------------------------------------------|----------------------------------------|-----------------------------------------|
| Excavator transport                | 58.8     | tkm | 1,13E-05                      | 8,14E+01                       | 5,29E+00                                | 1,01E-06                              | 2,31E+00                       | 7,37E-01                                    | 1,57E+03                                   | 7,10E-03                                | 6,73E-04                                                       | 1,73E-02                               | 3,79E-03                                |
| Excavator consumption              | 6,732.0  | kWh | 1,20E-03                      | 3,02E+04                       | 2,20E+03                                | 3,76E-04                              | 2,68E+02                       | 2,26E+02                                    | 3,78E+05                                   | 7,60E-01                                | 3,57E-01                                                       | 1,65E+01                               | 3,80E+00                                |
| TNT 300 production                 | 3,300.0  | kg  | 1,88E-01                      | 3,08E+05                       | 1,73E+04                                | 3,55E-02                              | 1,13E+04                       | 8,38E+03                                    | 1,92E+07                                   | 3,27E+01                                | 3,99E+00                                                       | 7,27E+01                               | 2,76E+01                                |
| TNT 300 transport                  | 79.9     | tkm | 1,51E-03                      | 1,63E+03                       | 1,14E+02                                | 1,99E-05                              | 8,48E+01                       | 5,24E+01                                    | 7,50E+04                                   | 1,44E-01                                | 6,11E-02                                                       | 4,62E-01                               | 1,17E-01                                |
| LDPE production                    | 1,083.5  | kg  | 1,42E-02                      | 7,24E+04                       | 2,09E+03                                | 3,73E-05                              | 8,75E+02                       | 6,70E+02                                    | 1,47E+06                                   | 1,97E+00                                | 1,41E+00                                                       | 6,89E+00                               | 2,13E+00                                |
| LDPE transport                     | 84.4     | tkm | 1,59E-03                      | 1,73E+03                       | 1,20E+02                                | 2,10E-05                              | 8,96E+01                       | 5,54E+01                                    | 7,92E+04                                   | 1,52E-01                                | 6,45E-02                                                       | 4,88E-01                               | 1,23E-01                                |
| Quarry stabilized production       | 1,350.0  | t   | 9,54E-02                      | 5,16E+04                       | 4,57E+03                                | 5,26E-04                              | 4,34E+03                       | 4,38E+03                                    | 7,09E+06                                   | 1,29E+01                                | 1,28E+00                                                       | 2,90E+01                               | 8,41E+00                                |
| Quarry stabilized transport        | 31,320.0 | tkm | 6,04E-03                      | 4,34E+04                       | 2,82E+03                                | 5,38E-04                              | 1,23E+03                       | 3,92E+02                                    | 8,34E+05                                   | 3,78E+00                                | 3,58E-01                                                       | 9,19E+00                               | 2,02E+00                                |
| Bobcat consumption                 | 1,632.0  | kWh | 2,91E-04                      | 7,32E+03                       | 5,33E+02                                | 9,11E-05                              | 6,49E+01                       | 5,48E+01                                    | 9,17E+04                                   | 1,84E-01                                | 8,66E-02                                                       | 3,99E+00                               | 9,22E-01                                |
| Binder production                  | 552.5    | t   | 4,28E-01                      | 2,27E+06                       | 3,19E+04                                | 5,15E-02                              | 2,99E+04                       | 2,81E+04                                    | 7,07E+07                                   | 3,49E+02                                | 1,59E+01                                                       | 2,62E+02                               | 7,31E+01                                |
| Binder, paver and roller transport | 8,100.0  | tkm | 1,56E-03                      | 1,12E+04                       | 7,29E+02                                | 1,39E-04                              | 3,18E+02                       | 1,01E+02                                    | 2,16E+05                                   | 9,77E-01                                | 9,27E-02                                                       | 2,38E+00                               | 5,22E-01                                |
| Paver and roller                   | 4,760.0  | kWh | 8,49E-04                      | 2,13E+04                       | 1,55E+03                                | 2,66E-04                              | 1,89E+02                       | 1,60E+02                                    | 2,67E+05                                   | 5,37E-01                                | 2,53E-01                                                       | 1,16E+01                               | 2,69E+00                                |

|                     |      |     |          |          |          |          |          |          |          |          |          |          |          |
|---------------------|------|-----|----------|----------|----------|----------|----------|----------|----------|----------|----------|----------|----------|
| consumption         |      |     |          |          |          |          |          |          |          |          |          |          |          |
| Excavator transport | 58.8 | tkm | 1,13E-05 | 8,14E+01 | 5,29E+00 | 1,01E-06 | 2,31E+00 | 7,37E-01 | 1,57E+03 | 7,10E-03 | 6,73E-04 | 1,73E-02 | 3,79E-03 |
| Total               |      |     | 7,39E-01 | 2,82E+06 | 6,39E+04 | 8,91E-02 | 4,87E+04 | 4,26E+04 | 1,00E+08 | 4,04E+02 | 2,38E+01 | 4,15E+02 | 1,21E+02 |
